# Supplementary material for: A novel approach to photoelectrochemical immunoassay for procalcitonin on the basis of SnS2/CdS
Source: Royal Society of Chemistry journal article supplement (doi:10.1039/d0nj02764b), 2020-01-01
Supplement: d0nj02764b1.pdf [file d0nj02764b1.pdf]

1                                   **Supplementary Materials**

2       Novel approach to photoelectrochemical immunoassay for  
3                                   procalcitonin on the basis of SnS<sub>2</sub>/CdS

4

5       Mengdi Wang, Xuejing Liu, Hongying Jia, Yuyang Li, Xing Ren, Dan  
6                                   Wu, Huan Wang, Qin Wei\*, Huangxian Ju

7

8       Key Laboratory of Interfacial Reaction & Sensing Analysis in Universities of  
9       Shandong, School of Chemistry and Chemical Engineering, University of Jinan, Jinan  
10      250022, PR China

11

12

13

14

15

16   **\*Corresponding author**

17   E-mail: [sdjndxwq@163.com](mailto:sdjndxwq@163.com) (Q. Wei)

18   Tel: +86 531 82767872;

19   Fax: +86 531 82767367

## 21 Materials and reagents

22 Tin (IV) chloride pentahydrate ( $\text{SnCl}_4 \cdot 5\text{H}_2\text{O}$ ) was purchased from Macklin  
23 Biochemical Co., Ltd (Shanghai, China). Cadmium acetate ( $\text{C}_4\text{H}_6\text{CdO}_4 \cdot 2\text{H}_2\text{O}$ ) was  
24 obtained from Shanghai Runjie Chemical Reagent Co., Ltd. Thiocarbamide  
25  $((\text{NH}_2)_2\text{CS})$  was obtained from Beijing Chemical Plant. Thioglycolic acid (TGA) was  
26 obtained from Tianjin Kermel Chemical Reagent Co., Ltd. 1-ethyl-3-(3-  
27 dimethylaminopropyl) carbodiimide hydrochloride (EDC) and N-hydroxysuccinimide  
28 (NHS) were obtained from Shanghai Civic Chemical Technology Co., Ltd. Bovine  
29 serum albumin (BSA) was obtained from Aladdin Reagent Co., Ltd. (Shanghai,  
30 China). Serum procalcitonin (PCT) and anti-procalcitonin (anti-PCT) were all  
31 purchased from Nanjing Kingsrui Biotechnology Co., Ltd. Phosphate buffer solution  
32 (PBS) which was prepared by disodium hydrogen phosphate ( $\text{Na}_2\text{HPO}_4 \cdot 12\text{H}_2\text{O}$ , 0.1  
33 mol/L) and potassium phosphate monobasic ( $\text{KH}_2\text{PO}_4$ , 0.1 mol/L). All other  
34 chemicals were analytical grade and used without further purification. All aqueous  
35 solutions were prepared using ultra-pure water.

36

## 37 Apparatus

38 The experiments carried out in a DZF-6020 vacuum drier (Shanghai boxun  
39 industrial co. LTD. Medical equipment factory). The photocurrent and  
40 electrochemical impedance spectroscopy (EIS) were detected on an IM6-Zennium  
41 electrochemical workstation (Zahner, Germany). X-ray diffraction (XRD) patterns  
42 were measured using D8 focus diffractometer (Bruker AXS, Germany). XPS

43 spectrums were acquired on ESCALAB 250XI (Thermo, America). High-resolution  
44 transmission electron microscope (HRTEM) images were obtained on an H-800  
45 transmission electron microscope (Hitachi, Japan). A conventional three electrodes  
46 system, which contains a Pt wire counter electrode, a potassium chloride (KCl)  
47 saturated calomel reference electrode and an ITO conductive glass (Zhuhai kaiwei  
48 electronic components Co., Ltd.) working electrode, was used in the measurement of  
49 photocurrent.

50

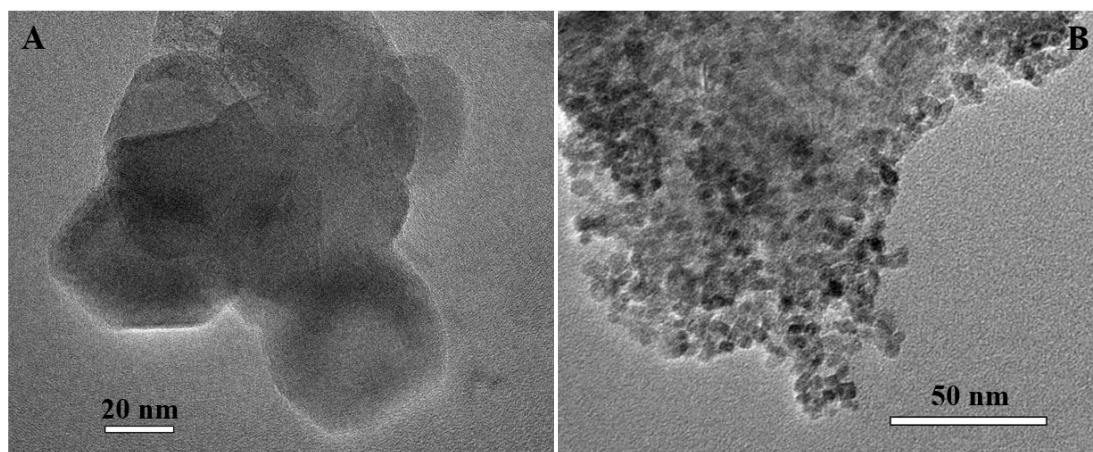

51  
52

Fig. S1 HRTEM images of (A) SnS<sub>2</sub>, (B) CdS.

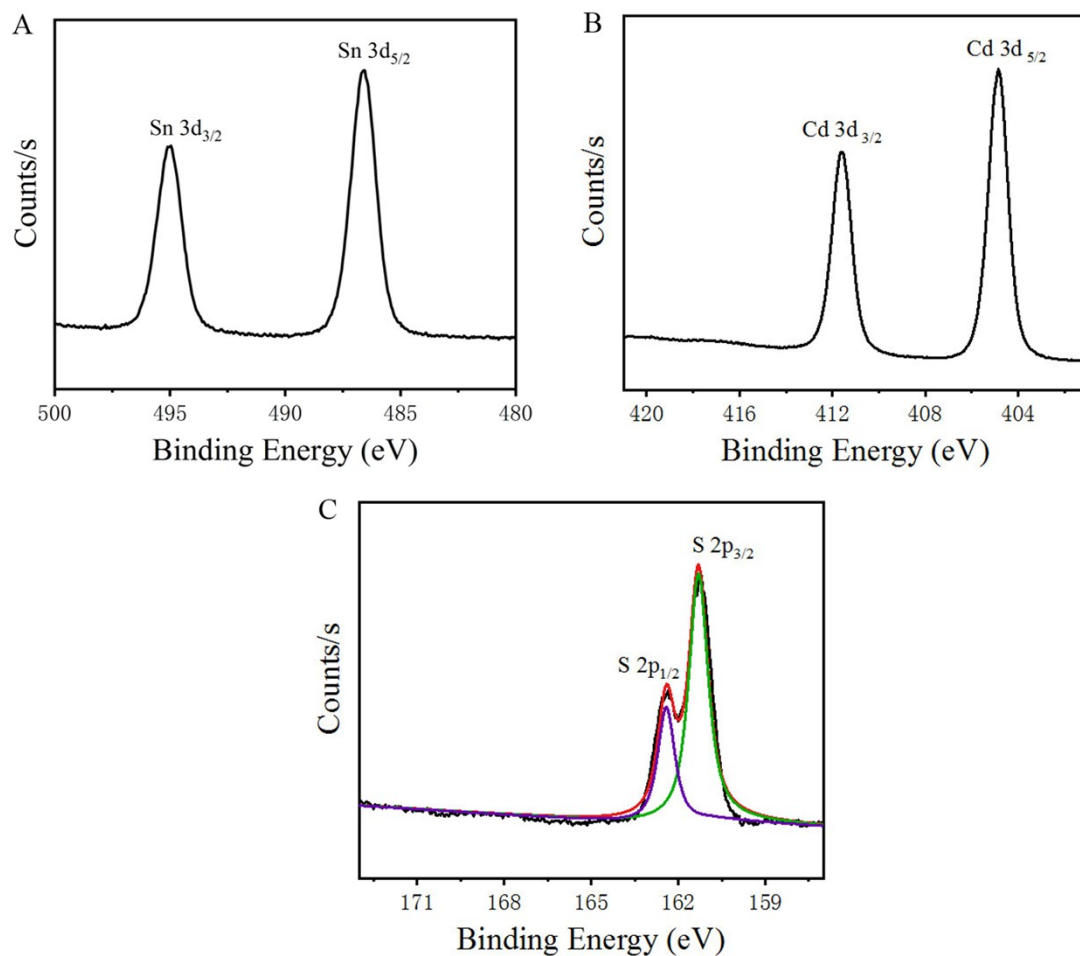

53

54

Fig. S2 XPS patterns of the as-prepared SnS<sub>2</sub>/CdS: (A) Sn 3d, (B) Cd 3d, (C) S 2p.

55

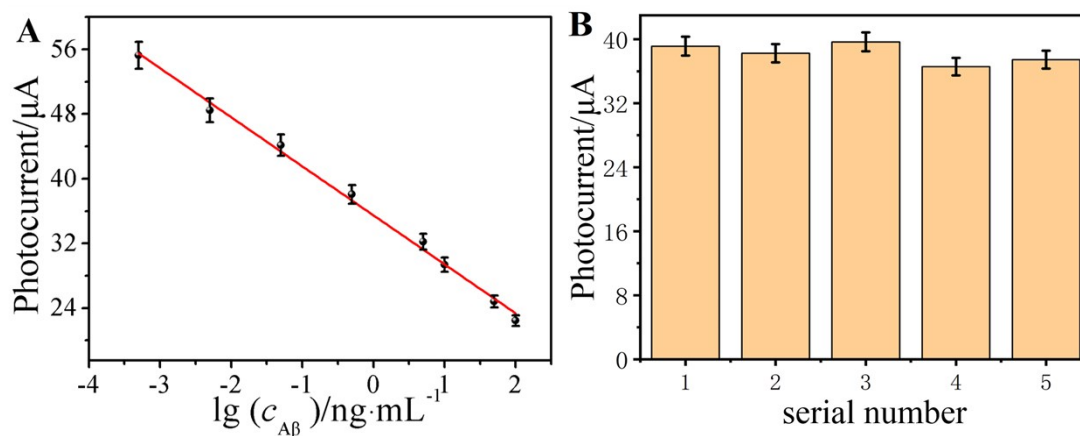

56

57

58

Fig. S3 (A) Calibration curves for immunoassay after modification of PCT at different concentrations ( $\Delta I = 35.39 - 5.93 \lg c$ ,  $R^2 = 0.9953$ ). (B) Reproducibility of the PEC immunoassay.

Table S1. Comparison with other published immunosensor for the analysis of PCT.

| Method                                  | Linear range<br>(ng mL <sup>-1</sup> ) | Detection limit<br>(pg mL <sup>-1</sup> ) | Reference |
|-----------------------------------------|----------------------------------------|-------------------------------------------|-----------|
| Fluorescence                            | 0.1-3                                  | 20                                        | 1         |
| Lateral Flow Immunoassay                | 0.5-10                                 | 100                                       | 2         |
| Imaging Ellipsometry                    | 0.125-128                              | 81                                        | 3         |
| Electrochemiluminescence                | 0.00005-10                             | 0.017                                     | 4         |
| Sandwich-type<br>Electrochemical sensor | 0.05-100                               | 0.1                                       | 5         |
| This work                               | 0.0005-100                             | 0.17                                      | This work |

Table S2. PCT analysis in human serum fluid sample by prepared PEC immunoassay system

| Initial PCT<br>in the sample<br>(ng/mL) | Added<br>amounts<br>(ng/mL) | Detection amounts<br>(ng/mL) | RSD<br>(%) | Recovery<br>(%) |
|-----------------------------------------|-----------------------------|------------------------------|------------|-----------------|
|                                         | 0.30                        | 1.02, 0.03, 0.95, 0.96, 0.99 | 3.2        | 101             |
| 0.68                                    | 0.60                        | 1.34, 1.33, 1.31, 1.27, 1.29 | 2.8        | 102             |
|                                         | 1.00                        | 1.75, 1.71, 1.64, 1.65, 1.67 | 4.1        | 100             |

## References

1. D. Rascher, A. Geerlof, E. Kremmer, P. Krämer, M. Schmid, A. Hartmann and M. Rieger, *Biosens. Bioelectron.*, 2014, 59, 251-258.
2. K. V. Serebrennikova, J. V. Samsonova, A. P. Osipov, D. Senapati and D. V. Kuznetsov, *Nano Hybrids and Composites*, 2017, 13, 47-53.
3. Y. Li, W. Liu, G. Jin, Y. Niu, Y. Chen and M. Xie, *Anal Chem*, 2018, 90, 8002-8010.
4. P. Chen, X. Qiao, J. Liu, F. Xia, T. Dong and C. Zhou, *Sensor. Actuat. B-Chem.*, 2018.
5. P. Liu, C. Li, R. Zhang, Q. Tang, J. Wei, Y. Lu and P. Shen, *Biosens. Bioelectron.*, 2019, 126, 543-550.
